# Supplementary material
Source: PubMed Central journal article supplement (PMC2708134)
Supplement: NIHMS5179-supplement-Spplementary_Table3.pdf [file NIHMS5179-supplement-Spplementary_Table3.pdf]

**Supplementary Material, Table S3** Haplotype frequency estimates for the haplotypes constructed from the eight consecutive associating SNPs within the TLE gene cluster at 19p13. Results produced in the extended pedigree cases and regional controls with Phase v2.1.1 with the assumption of no recombination. Haplotypes not observed in the cases are indicated with an x.

|   |           | Haplotype counts |              | Haplotype frequency estimates (E[freq]) |        |
|---|-----------|------------------|--------------|-----------------------------------------|--------|
| # | Haplotype | Controls (n=93)  | Cases (n=33) | Controls                                | Cases  |
| 1 | ACGCCAGC  | 1                | 0            | 0.002                                   | 0.0002 |
| 2 | ACGCCATC  | 8                | 1            | 0.043                                   | 0.015  |
| 3 | ACGCCGTC  | 45               | 10           | 0.242                                   | 0.151  |
| 4 | ACGCGGTC  | 6                | 0            | 0.032                                   | x      |
| 5 | ATGCCAGC  | 71               | 39           | 0.385                                   | 0.592  |
| 6 | ATGTCAGC  | 8                | 5            | 0.042                                   | 0.075  |
| 7 | GCACCATC  | 41               | 6            | 0.220                                   | 0.091  |
| 8 | GTGCCAGC  | 3                | 0            | 0.013                                   | x      |
| 9 | GTGTGAGT  | 3                | 5            | 0.016                                   | 0.076  |
