# Supplementary material
Source: PubMed Central journal article supplement (PMC2708134)
Supplement: NIHMS5179-supplement-Supplementary_Figures.pdf [file NIHMS5179-supplement-Supplementary_Figures.pdf]

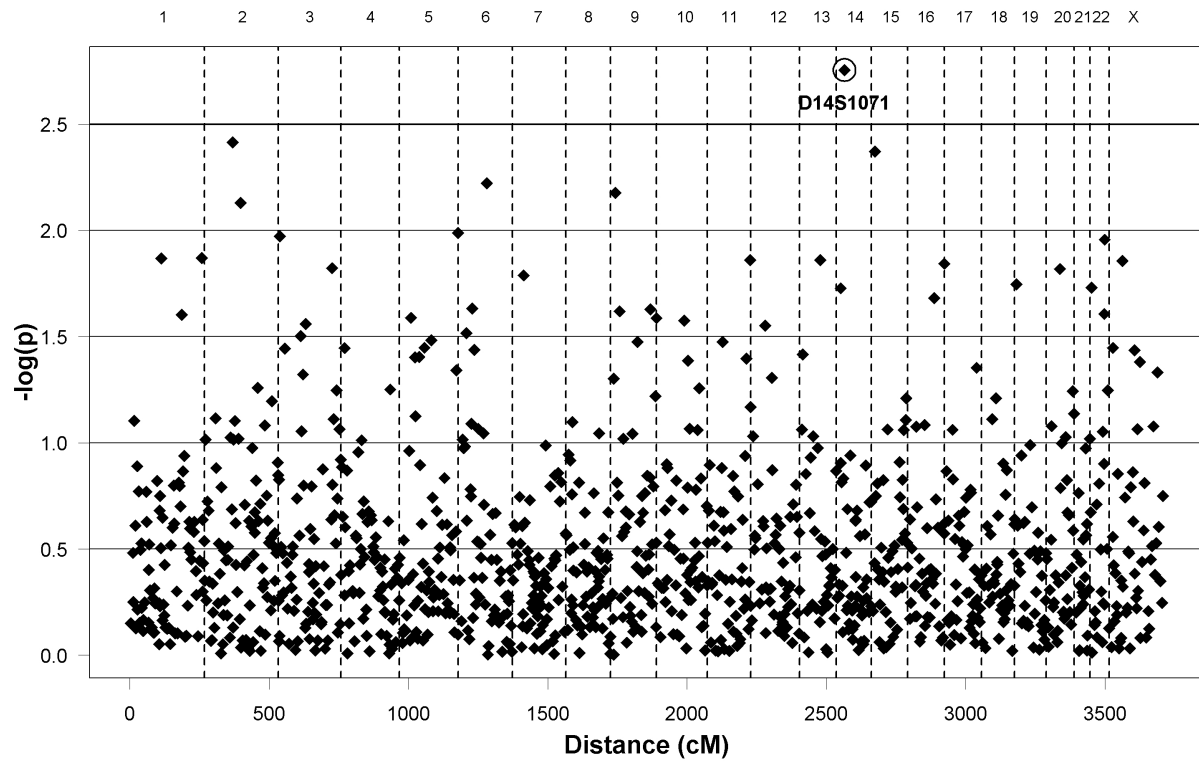

**Figure S1** Distribution of microsatellite marker LD+Linkage values of the initial genome-wide scan. Results produced by dominant Pseudomarker analysis in the extended pedigree (Set 1). The y-axis presents  $-\log(p)$  values as a function of genetic distance (x-axis, in cM). The single marker with  $-\log(p) > 2.5$  is displayed. Detailed results for D14S1071 (chromosome 14q12; genetic distance 28.2 cM, deCODE Genetic map) are: LD+Linkage  $-\log(p) = 2.76$ , LDLinkage  $-\log(p) = 2.93$ .

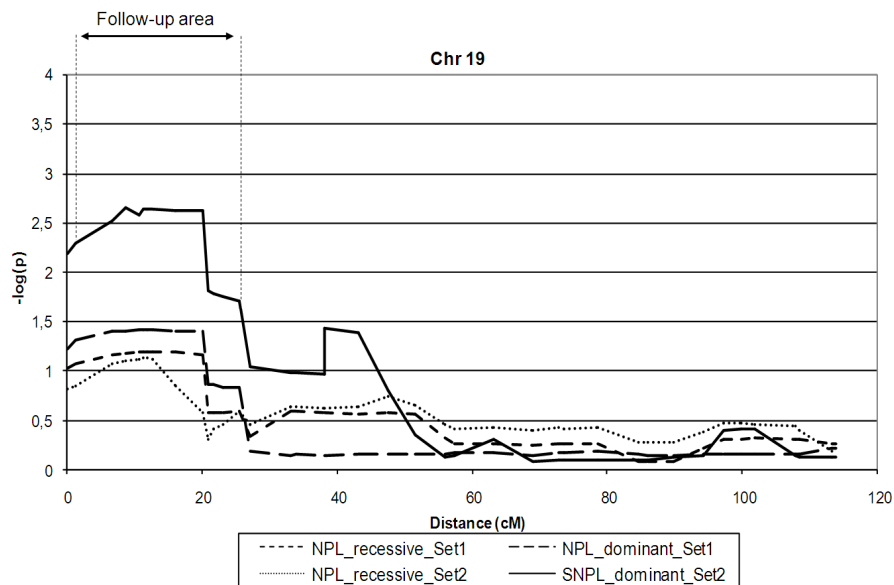

**Figure S2** Multipoint linkage results at chromosome 19p after the inclusion of seven follow-up microsatellites. Original number of markers in the initial scan was 34. Results produced by non-parametric Simwalk2 analysis in the extended pedigree. "NPL\_dominant" equals to the Simwalk2 "MAX-TREE" statistic, while "NPL\_recessive" equals to the "BLOCKS" statistics.

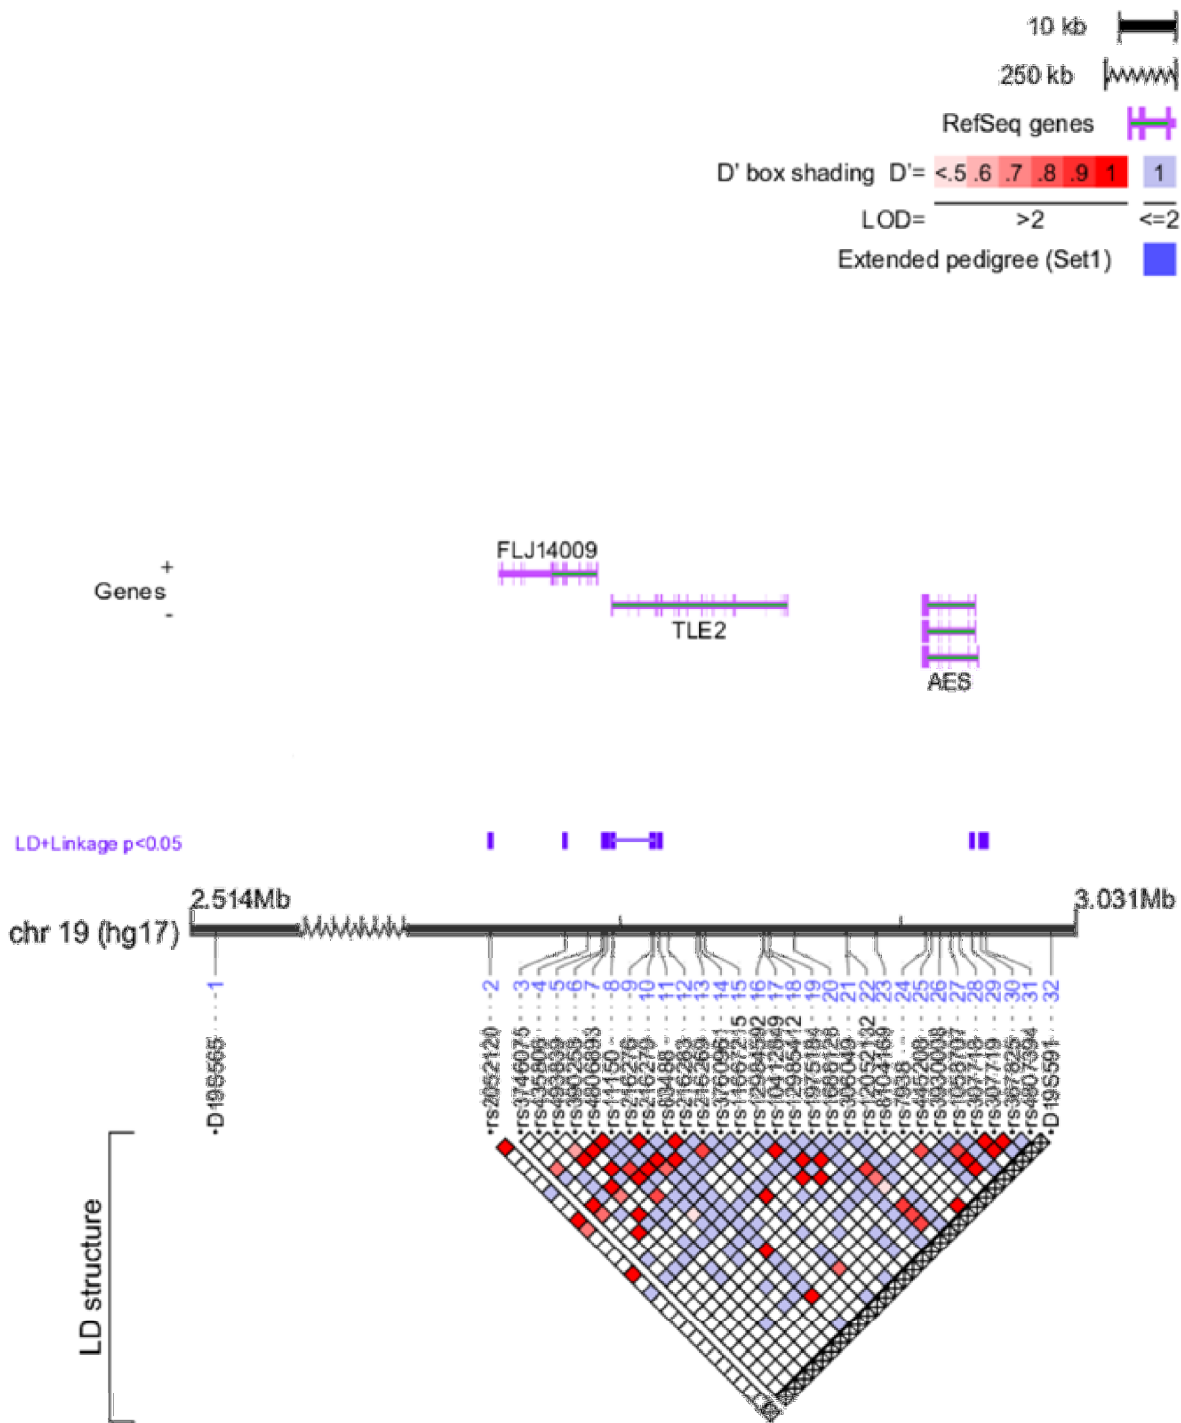

**Figure S3** The TLE gene cluster at 19p13.3. Figure illustrating the organization of the TLE-locus, including pairwise marker LD structure and markers giving significant association in the extended pedigree (Set1 results). Eight consecutive SNPs with  $p < 0.04$  in the same analysis are connected with a line. FLJ14009 stands for TLE6. Figure generated with LocusView 2.0 program (T. Petryshen, A. Kirby, M. Ainscow, unpublished software; <http://www.broad.mit.edu/mpg/locusview/>).

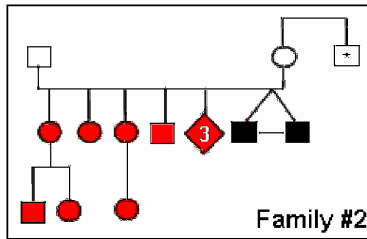

| Chr19 | p13.3 |   |   |   |   |    |   | p12 |   |   |   |    |   |   | q12 |   |   |   |   |   |   | q13.2 |   |   |   |    |   |   |   |   |   |   |   |   |
|-------|-------|---|---|---|---|----|---|-----|---|---|---|----|---|---|-----|---|---|---|---|---|---|-------|---|---|---|----|---|---|---|---|---|---|---|---|
| AUT   | 2     | 4 | 1 | 3 | 6 | 2  | 2 | 1   | 8 | 2 | 4 | 2  | 3 | 2 | 3   | 1 | 1 | 4 | 1 | 2 | 4 | 7     | 5 | 5 | 2 | 5  | 4 | 6 | 6 | 7 | 6 | 3 | 1 | 2 |
|       | 3     | 4 | 7 | 4 | 2 | 2  | 4 | 2   | 4 | 2 | 4 | 8  | 3 | 1 | 9   | 4 | 5 | 4 | 3 | 1 | 6 | 7     | 5 | 6 | 1 | 3  | 3 | 6 | 1 | 4 | 3 | 3 | 1 | 3 |
| AS    | 1     | 4 | 8 | 3 | 6 | 2  | 2 | 1   | 8 | 2 | 4 | 2  | 3 | 2 | 3   | 1 | 1 | 4 | 1 | 2 | 4 | 7     | 5 | 5 | 2 | 5  | 4 | 6 | 6 | 7 | 5 | 3 | 3 | 2 |
|       | 1     | 8 | 1 | 4 | 5 | 2  | 3 | 1   | 4 | 2 | 3 | 7  | 6 | 2 | 9   | 4 | 1 | 3 | 3 | 1 | 6 | 7     | 5 | 6 | 1 | 3  | 3 | 6 | 1 | 7 | 5 | 3 | 1 | 4 |
| AS    | 2     | 4 | 1 | 3 | 6 | 10 | 2 | 1   | 3 | 2 | 5 | 7  | 3 | 3 | 3   | 4 | 1 | 1 | 1 | 7 | 6 | 2     | 6 | 5 | 8 | 11 | 3 | 6 | 8 | 7 | 6 | 3 | 1 | 2 |
|       | 3     | 4 | 7 | 4 | 2 | 2  | 4 | 2   | 4 | 2 | 4 | 8  | 3 | 1 | 9   | 4 | 5 | 4 | 3 | 1 | 6 | 7     | 5 | 6 | 1 | 3  | 3 | 6 | 1 | 7 | 3 | 3 | 1 | 3 |
| AS    | 2     | 4 | 1 | 3 | 6 | 10 | 2 | 1   | 8 | 2 | 4 | 2  | 3 | 2 | 3   | 1 | 1 | 4 | 1 | 2 | 4 | 7     | 5 | 5 | 2 | 5  | 4 | 6 | 6 | 7 | 6 | 3 | 1 | 2 |
|       | 1     | 8 | 1 | 4 | 5 | 2  | 3 | 1   | 4 | 2 | 3 | 7  | 3 | 1 | 9   | 4 | 5 | 4 | 3 | 1 | 6 | 7     | 5 | 6 | 1 | 3  | 3 | 6 | 1 | 7 | 5 | 3 | 1 | 4 |
| AS    | 2     | 4 | 1 | 3 | 6 | 10 | 2 | 1   | 3 | 2 | 5 | 7  | 3 | 3 | 3   | 4 | 1 | 1 | 1 | 7 | 6 | 2     | 6 | 5 | 8 | 11 | 3 | 1 | 8 | 3 | 5 | 3 | 3 | 2 |
|       | 3     | 4 | 7 | 4 | 2 | 2  | 4 | 2   | 4 | 2 | 4 | 8  | 3 | 1 | 9   | 4 | 1 | 3 | 3 | 1 | 6 | 7     | 5 | 6 | 1 | 3  | 3 | 6 | 1 | 7 | 5 | 3 | 1 | 4 |
| AS    | 2     | 4 | 1 | 3 | 6 | 10 | 2 | 1   | 3 | 2 | 5 | 7  | 3 | 3 | 3   | 4 | 1 | 1 | 1 | 7 | 6 | 2     | 6 | 5 | 8 | 11 | 3 | 1 | 8 | 3 | 5 | 3 | 3 | 2 |
|       | 3     | 4 | 7 | 4 | 2 | 2  | 4 | 2   | 4 | 2 | 4 | 8  | 3 | 1 | 9   | 4 | 1 | 3 | 2 | 5 | 6 | 7     | 1 | 6 | 1 | 3  | 3 | 6 | 1 | 7 | 5 | 3 | 1 | 4 |
| AS    | 2     | 4 | 1 | 3 | 6 | 10 | 2 | 1   | 3 | 2 | 5 | 7  | 3 | 3 | 3   | 4 | 1 | 4 | 1 | 2 | 4 | 7     | 5 | 5 | 2 | 5  | 4 | 6 | 6 | 7 | 6 | 3 | 3 | 2 |
|       | 3     | 4 | 7 | 4 | 2 | 2  | 4 | 2   | 4 | 2 | 4 | 8  | 3 | 1 | 9   | 4 | 1 | 3 | 2 | 5 | 6 | 7     | 1 | 6 | 1 | 3  | 3 | 6 | 1 | 4 | 3 | 3 | 1 | 3 |
| AS    | 2     | 3 | 9 | 4 | 4 | 3  | 4 | 1   | 8 | 1 | 4 | 2  | 7 | 2 | 3   | 4 | 5 | 5 | 3 | 7 | 7 | 5     | 6 | 2 | 1 | 11 | 1 | 7 | 8 | 3 | 3 | 3 | 1 | 5 |
|       | 3     | 4 | 7 | 4 | 2 | 2  | 4 | 2   | 4 | 2 | 4 | 8  | 3 | 1 | 9   | 4 | 1 | 3 | 3 | 7 | 6 | 2     | 6 | 5 | 8 | 3  | 3 | 6 | 1 | 7 | 5 | 3 | 1 | 4 |
| AS    | 2     | 4 | 3 | 3 | 5 | 2  | 3 | 1   | 2 | 3 | 3 | 12 | 3 | 1 | 7   | 3 | 1 | 2 | 3 | 1 | 6 | 3     | 1 | 5 | 1 | 9  | 3 | 8 | 3 | 7 | 1 | 3 | 1 | 4 |
|       | 3     | 4 | 7 | 4 | 2 | 2  | 4 | 2   | 4 | 2 | 4 | 8  | 3 | 1 | 9   | 4 | 5 | 4 | 3 | 7 | 6 | 2     | 6 | 5 | 8 | 11 | 3 | 6 | 6 | 7 | 6 | 3 | 1 | 2 |
| AS    | 1     | 3 | 8 | 3 | 6 | 7  | 3 | 1   | 2 | 3 | 3 | 12 | 3 | 1 | 7   | 3 | 1 | 2 | 3 | 1 | 6 | 3     | 1 | 5 | 1 | 9  | 3 | 8 | 3 | 7 | 1 | 3 | 3 | 2 |
|       | 3     | 4 | 7 | 4 | 2 | 2  | 4 | 2   | 4 | 2 | 4 | 8  | 3 | 1 | 9   | 4 | 1 | 1 | 1 | 7 | 6 | 2     | 6 | 5 | 8 | 11 | 3 | 6 | 6 | 7 | 6 | 3 | 1 | 2 |

**Figure S4** Chromosome 19 microsatellite haplotypes of affected individuals in family #2 indicating shared regions. In the pedigree picture, autism is indicated with black and AS in red. Only microsatellites from the initial scan are included. The follow-up area from markers two to eight is delimited with borders. The family contains one additional individual with AS-diagnosis (\*), but the sample was not available for the initial scan.
