# Supplementary material
Source: PubMed Central journal article supplement (PMC2708134)
Supplement: NIHMS5179-supplement-Supplementary_Table_1.pdf [file NIHMS5179-supplement-Supplementary_Table_1.pdf]

**Supplementary Material, Table S1** Study samples and the number of markers analyzed in the follow-up and fine-map stages per locus. Abbreviations: Ext ped=extended pedigree, AUT=autism study sample, AS=Asperger syndrome study sample.

| Locus | Follow-up microsatellites | Study samples | Fine-map SNPs | Study samples        |
|-------|---------------------------|---------------|---------------|----------------------|
| 1q23  | 23 <sup>a</sup>           | Ext ped       | 31            | Ext ped, AUT, AS     |
| 15q12 | 7 <sup>b</sup>            | Ext ped       | 41            | Ext ped, AUT, AS     |
| 19p13 | 7 <sup>c</sup>            | Ext ped       | 80            | Ext ped <sup>d</sup> |
| 14q11 | 1                         | Ext ped       | x             | x                    |
| 13q12 | 2                         | Ext ped       | x             | x                    |
| 8q23  | 1                         | Ext ped       | x             | x                    |
| 6p    | 1                         | Ext ped       | x             | x                    |
| 5q    | 2                         | Ext ped       | x             | x                    |

<sup>a</sup>from D1S1631 to D1S1589; region 55.2 cM

<sup>b</sup>from D15S97 to D15S165; region 10.4 cM

<sup>c</sup>from D19S883 to D19S873; region 24.1 cM

<sup>d</sup>markers for *TLE6*, *TLE2* and *AES* genes were analyzed also in the AUT and AS study samples
